# Supplementary material for: Cycloguanil and Analogues Potently Target DHFR in Cancer Cells to Elicit Anti-Cancer Activity
Source: MDPI journal article supplement (doi:10.3390/metabo13020151), 2023-01-19
Supplement: s1 [file s1]

## Supplementary Materials for:

### Cycloguanil and analogues target DHFR in cancer cells to elicit anti-cancer activity

Jennifer I. Brown <sup>1</sup>, Peng Wang <sup>2,3</sup>, Alan Y. L. Wong <sup>2,4</sup>, Boryana Petrova <sup>2,3</sup>, Rosanne Persaud <sup>1</sup>, Sepideh Soukhthezari <sup>1</sup>, Melanie Lopez McDonald <sup>5</sup>, Danielle Hanke <sup>1</sup>, Josephine Christensen <sup>1</sup>, Petar Iliev <sup>1</sup>, Weiyuan Wang <sup>5</sup>, Daniel K. Everton <sup>1</sup>, Karla C. Williams <sup>1</sup>, David A. Frank <sup>5</sup>, Naama Kanarek <sup>2,3,6</sup>, and Brent D. G. Page <sup>1,\*</sup>

<sup>1</sup> Faculty of Pharmaceutical Sciences, University of British Columbia, Vancouver, BC, Canada

<sup>2</sup> Department of Pathology, Boston Children's Hospital, Boston, MA, 02115, USA

<sup>3</sup> Harvard Medical School, Boston, MA, 02115, USA

<sup>4</sup> Harvard MD-PhD Program, Harvard Medical School, Boston, MA, 02115, USA

<sup>5</sup> Department of Hematology and Medical Oncology, Emory University, Atlanta, GA, USA

<sup>6</sup> The Broad Institute of Harvard and MIT, Cambridge, MA, USA

\* Correspondence: [brent.page@ubc.ca](mailto:brent.page@ubc.ca)

#### List of Figures

|                                                                                                                  |    |
|------------------------------------------------------------------------------------------------------------------|----|
| Figure S1. Ligand-receptor 2D interaction diagrams for the top pose of each docked compound .....                | 2  |
| Figure S2. Cycloguanil analogues inhibit DHFR enzymatic activity <i>in vitro</i> .....                           | 4  |
| Figure S3. Linear range of DHFR enzymatic assay .....                                                            | 5  |
| Figure S4. Melt curve for DHFR in cell lysate. ....                                                              | 8  |
| Figure S5. Uncropped Western blots for data presented in Figure S4.....                                          | 9  |
| Figure S6. Uncropped Western blots for data presented in Figure 5a and Figure 5b.....                            | 11 |
| Figure S7. Uncropped Western blots for data presented in Figure 5c .....                                         | 12 |
| Figure S8. Uncropped Western blots for data presented in Figure 5d .....                                         | 13 |
| Figure S9. Impact of cycloguanil analogues on thymidine phosphorylate thermal stability. ....                    | 14 |
| Figure S10. Uncropped Western blots for data presented in Figure S9a .....                                       | 15 |
| Figure S11. Impact of cycloguanil analogues on wound healing. ....                                               | 16 |
| Figure S12. Folinic acid supplementation significantly increases folate species that are downstream of DHFR..... | 17 |
| Figure S13. DHFR inhibitors block STAT3-dependent gene expression. ....                                          | 20 |

#### List of Tables

|                                                                                                                                            |    |
|--------------------------------------------------------------------------------------------------------------------------------------------|----|
| Table S1. Number of References found by structure search using SciFinder <sup>n</sup> as of January, 2023 .....                            | 3  |
| Table S2. Comparison of GI <sub>50</sub> values for each inhibitor from Human Tumor Cell Lines Screen reveal significant differences ..... | 5  |
| Table S3. GI <sub>50</sub> values for each inhibitor compared to the methotrexate gold standard separated by cell line .....               | 6  |
| Table S4. Cell viability with inhibitor alone and together with folinic acid .....                                                         | 7  |
| Table S5. CETSA analysis of DHFR in lysate treated with cycloguanil-like triazene compounds .....                                          | 10 |
| Table S6. Statistical comparisons for the data presented in Figure 6 .....                                                                 | 18 |
| Table S7. Statistical comparisons for the data presented in Figure 7 and Figure S13 .....                                                  | 21 |

|                             |    |
|-----------------------------|----|
| Supplementary Methods ..... | 22 |
| References .....            | 22 |

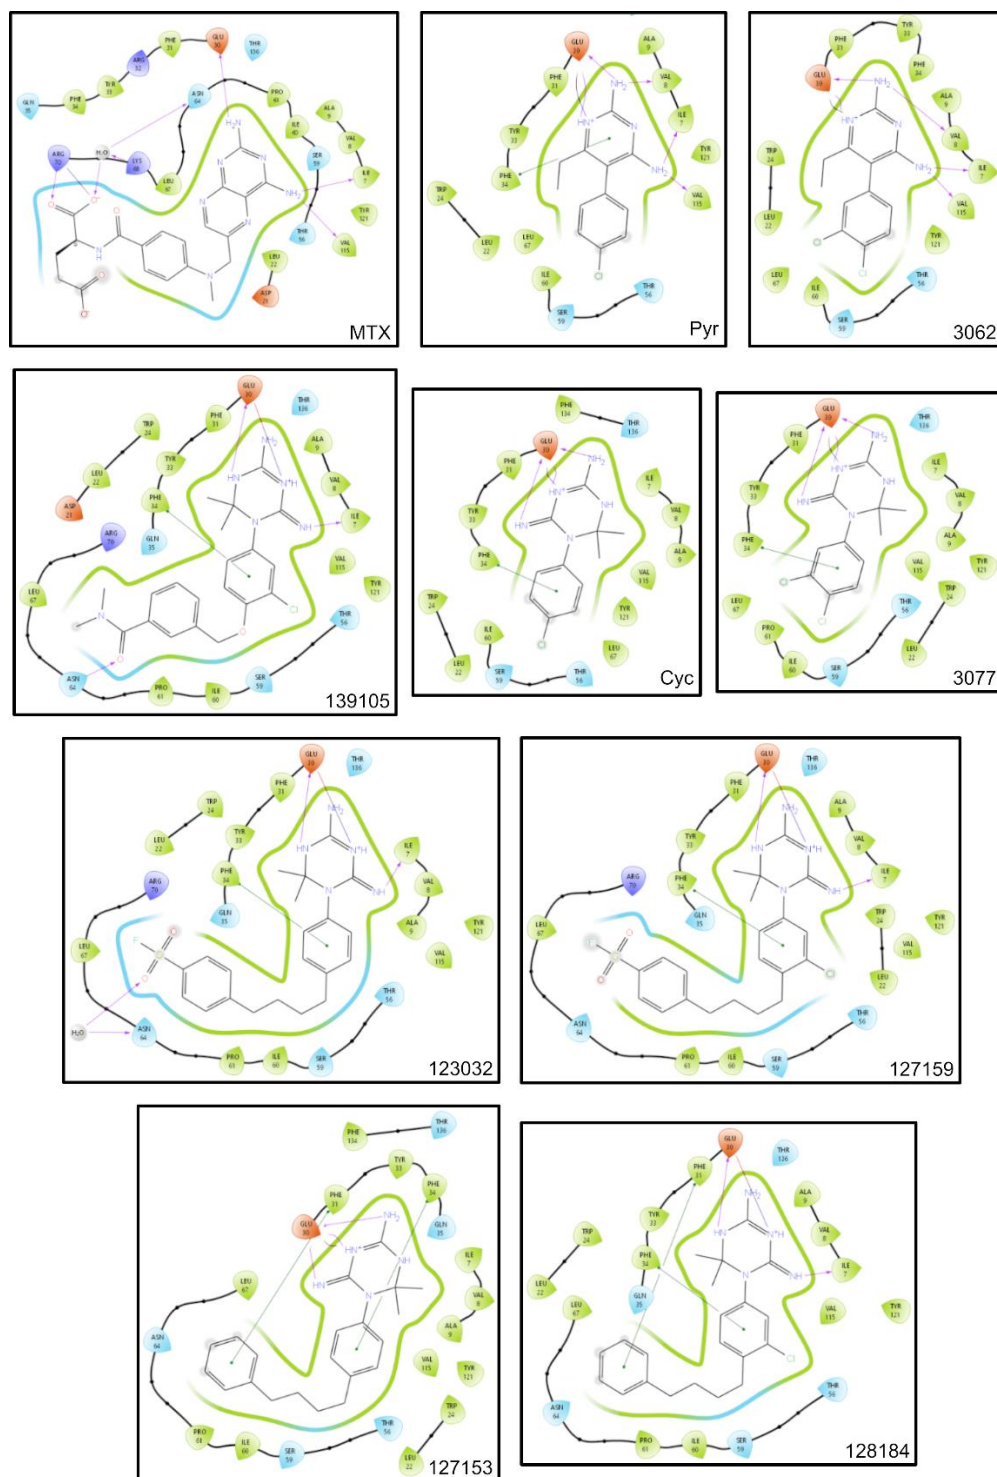

**Figure S1.** Ligand-receptor 2D interaction diagrams for the top pose of each docked compound. Diagrams highlight the conserved hydrogen bonding (purple arrow) between the heterocycles of each compound and Glu30 of the DHFR folate-binding site. Further conserved pi-stacking (green line) between the phenzyl moiety and Phe34 of most compounds is also highlighted. Orange residues are negatively charged, green residues are hydrophobic, and blue residues are polar. Ligand-receptor interactions were visualized using Maestro (Schrödinger).

**Table S1.** Number of References found by structure search using SciFinder<sup>n</sup> as of January, 2023.

| Compound   | Number of References as of Jan. 2023 |          |                        |
|------------|--------------------------------------|----------|------------------------|
| NSC Number | Neutral                              | HCl Salt | EtSO <sub>3</sub> Salt |
| 123032     | 9                                    | 0        | 1                      |
| 127159     | 6                                    | 0        | 1                      |
| 127153     | 11                                   | 2        | 0                      |
| 128184     | 8                                    | 1        | 0                      |

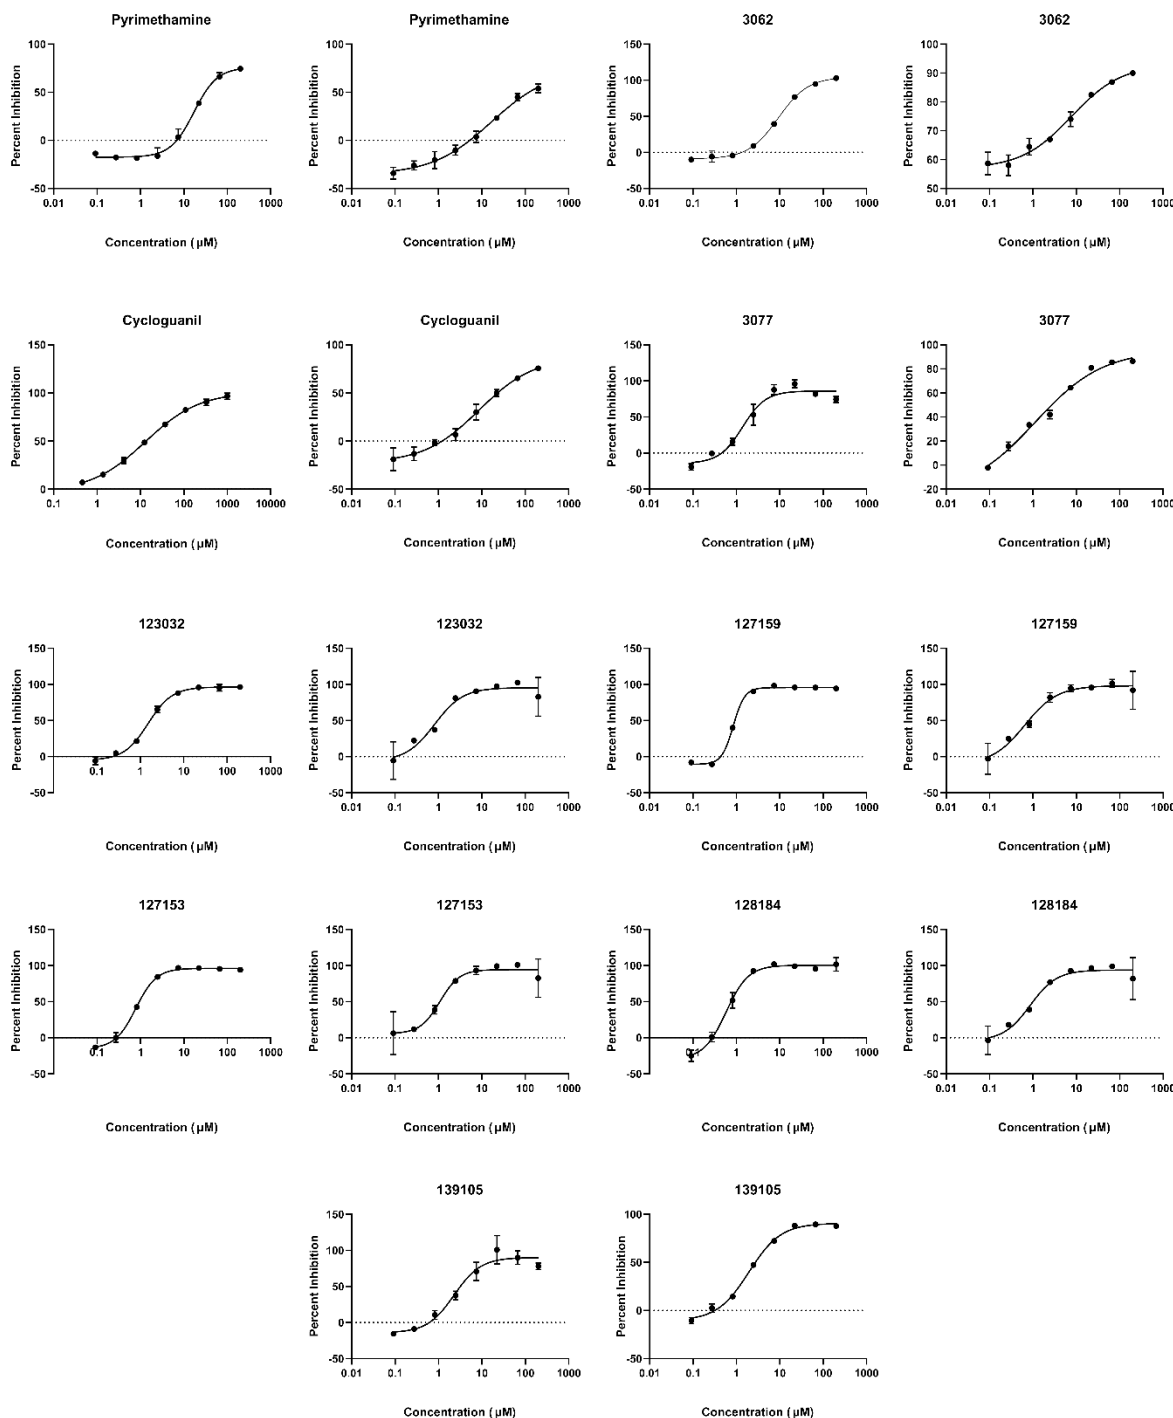

**Figure S2.** Cycloguanil analogues inhibit DHFR enzymatic activity *in vitro*. An enzymatic activity assay was performed for cycloguanil analogues and pyrimethamine and its chlorinated analogue 3062 by monitoring absorbance of NADPH at 340 nm. Percent inhibition was determined from absorbance values using equation (1). Percent inhibition was plotted against the concentration of each inhibitor ( $\mu\text{M}$ ,  $\text{Log}_{10}$  scale) and  $\text{IC}_{50}$  values were determined by fitting to equation (2) using GraphPad Prism Version 9.0. Experiments were performed in duplicate and two independent experiments were performed ( $n = 2$ ). Curves for *in vitro* inhibition of DHFR by methotrexate can be found in Heppler et al., 2022 [1].

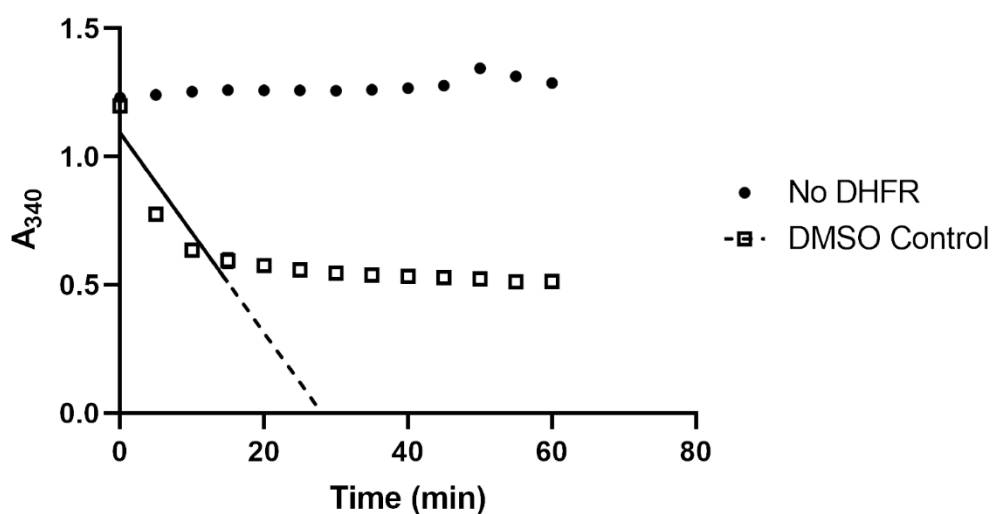

**Figure S3.** Linear range of DHFR enzymatic assay. A representative plot of No DHFR (black circles) and DMSO control (open square) reactions over 60 min. In the DMSO control representing 100% DHFR enzyme activity, DHFR consumption of NADPH is linear within 15 min of reaction initiation (dashed line of best fit  $R^2 = 0.8295$ ). Further, degradation of NADPH in the No DHFR control is negligible over 60 min. Error bars represent the standard deviation ( $n=2$ ), but most are too tight to be visible.

**Table S2.** Comparison of  $GI_{50}$  values for each inhibitor from Human Tumor Cell Lines Screen reveal significant differences.  $p$  values of each comparison of  $GI_{50}$  Pearson Correlation coefficients are shown. Resulting correlations of each comparison are shown in **Figure 2a**. Each comparison is significantly different, as determined by a two-tailed statistical analysis.

|        | MTX                    | Pyr                   | 3062                  | Cyc                    | 3077                   | 123032                 | 127159                 | 128184                 | 139105                 |
|--------|------------------------|-----------------------|-----------------------|------------------------|------------------------|------------------------|------------------------|------------------------|------------------------|
| MTX    |                        | $1.02 \times 10^{-8}$ | $1.98 \times 10^{-9}$ | 0.0050                 | $7.80 \times 10^{-8}$  | $9.00 \times 10^{-5}$  | $1.61 \times 10^{-6}$  | $4.00 \times 10^{-5}$  | $1.32 \times 10^{-10}$ |
| Pyr    | $1.02 \times 10^{-8}$  |                       | $1.69 \times 10^{-8}$ | 0.0050                 | $4.58 \times 10^{-6}$  | $5.00 \times 10^{-5}$  | $5.05 \times 10^{-5}$  | $1.00 \times 10^{-5}$  | $4.00 \times 10^{-6}$  |
| 3062   | $1.98 \times 10^{-9}$  | $1.69 \times 10^{-8}$ |                       | 0.0030                 | 0.0011                 | 0.043                  | 0.0055                 | 0.0066                 | 0.0011                 |
| Cyc    | 0.0050                 | 0.0050                | 0.0030                |                        | $6.31 \times 10^{-10}$ | 0.00019                | $6.40 \times 10^{-5}$  | 0.00038                | 0.015                  |
| 3077   | $7.80 \times 10^{-8}$  | $4.58 \times 10^{-6}$ | 0.0011                | $6.31 \times 10^{-10}$ |                        | $1.14 \times 10^{-6}$  | $1.77 \times 10^{-7}$  | $1.96 \times 10^{-9}$  | $5.46 \times 10^{-8}$  |
| 123032 | $9.00 \times 10^{-5}$  | $5.00 \times 10^{-5}$ | 0.043                 | 0.00019                | $1.14 \times 10^{-6}$  |                        | $1.97 \times 10^{-23}$ | $1.90 \times 10^{-14}$ | $1.42 \times 10^{-12}$ |
| 127159 | $1.61 \times 10^{-6}$  | $5.05 \times 10^{-5}$ | 0.0055                | $6.40 \times 10^{-5}$  | $1.77 \times 10^{-7}$  | $1.97 \times 10^{-23}$ |                        | $8.35 \times 10^{-13}$ | $4.07 \times 10^{-12}$ |
| 128184 | $4.00 \times 10^{-5}$  | $1.00 \times 10^{-5}$ | 0.0066                | 0.00038                | $1.96 \times 10^{-9}$  | $1.90 \times 10^{-14}$ | $8.35 \times 10^{-13}$ |                        | $3.91 \times 10^{-12}$ |
| 139105 | $1.32 \times 10^{-10}$ | $4.00 \times 10^{-6}$ | 0.0011                | 0.015                  | $5.46 \times 10^{-8}$  | $1.42 \times 10^{-12}$ | $4.07 \times 10^{-12}$ | $3.91 \times 10^{-12}$ |                        |

**Table S3.** GI<sub>50</sub> values for each inhibitor compared to the methotrexate gold standard separated by cell line. *p* values of each comparison of GI<sub>50</sub> Pearson Correlation coefficients are shown. Resulting correlations of each comparison are shown in **Figure 2b**. These data reveal that each inhibitor has significant correlations to methotrexate for both melanoma and breast cancer cell types. Statistical significance was determined by a two-tailed statistical analysis.

|               | <b>Leukemia</b> | <b>Non-Small Cell Lung</b> | <b>Colon</b> | <b>CNS</b> | <b>Melanoma</b> | <b>Ovarian</b> | <b>Renal</b> | <b>Breast</b> |
|---------------|-----------------|----------------------------|--------------|------------|-----------------|----------------|--------------|---------------|
| <b>Pyr</b>    | 0.0332          | 0.0898                     | 0.0298       | 0.0688     | 0.0048          | 0.0472         | 0.1498       | 0.2974        |
| <b>3062</b>   |                 | 0.0028                     | 0.2236       | 0.0665     | 0.0081          | 0.0399         | 0.0791       | 0.1469        |
| <b>Cyc</b>    | 0.5296          | 0.6265                     | 0.1959       | 0.1212     | 0.0077          | 0.1361         | 0.4639       | 0.6564        |
| <b>3077</b>   | 0.2265          | 0.0126                     | 0.0732       | 0.0045     | 0.0029          | 0.627          | 0.0743       | 0.0338        |
| <b>123032</b> | 0.8031          | 0.2505                     | 0.2349       | 0.5109     | 0.0041          | 0.5011         | 0.5997       | 0.0087        |
| <b>127159</b> | 0.4798          | 0.1421                     | 0.3722       | 0.3256     | 0.0103          | 0.4439         | 0.8261       | 0.0108        |
| <b>128184</b> | 0.1644          | 0.0015                     | 0.917        | 0.4146     | 0.0136          | 0.9486         | 0.9731       | 0.0193        |
| <b>139105</b> | 0.0890          | 0.0012                     | 0.6835       | 0.0016     | 0.0001          | 0.3423         | 0.3574       | 0.007         |

**Table S4.** Cell viability with inhibitor alone and together with folic acid. To determine statistical significance between each treatment with and without folic acid, data were analyzed using an Ordinary one-way ANOVA with the Šidák method for multiple comparisons. Error represents standard deviation of three replicates from three independent experiments (n=3).

| Treatment         | Relative Viability (%) – Inhibitor Alone | Relative Viability (%) – Inhibitor + FA Treatment | Adjusted <i>p</i> value (compared to Inhibitor Alone treatment) | Significance |
|-------------------|------------------------------------------|---------------------------------------------------|-----------------------------------------------------------------|--------------|
| <b>MCF-7</b>      |                                          |                                                   |                                                                 |              |
| DMSO              | 100.00 ± 0.0                             | 108.19 ± 4.1                                      | 0.9647                                                          | ns           |
| Pyrimethamine     | 85.23 ± 3.6                              | 94.91 ± 5.5                                       | 0.8965                                                          | ns           |
| NSC3062           | 65.16 ± 9.0                              | 100.10 ± 8.2                                      | 0.0002                                                          | ***          |
| Methotrexate      | 68.18 ± 8.9                              | 108.50 ± 11.7                                     | <0.0001                                                         | ****         |
| Cycloguanil       | 87.69 ± 3.1                              | 105.36 ± 5.9                                      | 0.1832                                                          | ns           |
| NSC3077           | 68.81 ± 6.9                              | 98.96 ± 0.6                                       | 0.0015                                                          | **           |
| NSC123032         | 81.94 ± 19.4                             | 104.16 ± 6.3                                      | 0.0381                                                          | *            |
| NSC127159         | 67.68 ± 13.3                             | 99.99 ± 3.2                                       | 0.0006                                                          | ***          |
| NSC127153         | 43.03 ± 13.9                             | 56.75 ± 7.9                                       | 0.5132                                                          | ns           |
| NSC128184         | 35.94 ± 11.4                             | 48.65 ± 6.9                                       | 0.6216                                                          | ns           |
| NSC139105         | 66.53 ± 8.1                              | 82.83 ± 9.7                                       | 0.2738                                                          | ns           |
| <b>MDA-MB-231</b> |                                          |                                                   |                                                                 |              |
| DMSO              | 100.00 ± 0.0                             | 108.64 ± 10.1                                     | 0.9968                                                          | ns           |
| Pyrimethamine     | 55.66 ± 9.9                              | 102.92 ± 19.8                                     | 0.0004                                                          | ***          |
| NSC3062           | 52.76 ± 12.1                             | 65.52 ± 15.0                                      | 0.9380                                                          | ns           |
| Methotrexate      | 53.86 ± 10.7                             | 95.03 ± 17.6                                      | 0.0027                                                          | **           |
| Cycloguanil       | 57.04 ± 11.0                             | 87.67 ± 20.5                                      | 0.0522                                                          | ns           |
| NSC3077           | 57.38 ± 10.0                             | 66.76 ± 10.4                                      | 0.9937                                                          | ns           |
| NSC123032         | 57.55 ± 3.1                              | 103.45 ± 16.5                                     | 0.0006                                                          | ***          |
| NSC127159         | 50.08 ± 8.8                              | 106.42 ± 15.0                                     | <0.0001                                                         | ****         |
| NSC127153         | 45.99 ± 10.6                             | 55.71 ± 12.7                                      | 0.9915                                                          | ns           |
| NSC128184         | 42.94 ± 9.7                              | 53.14 ± 12.7                                      | 0.9875                                                          | ns           |
| NSC139105         | 46.35 ± 9.0                              | 65.85 ± 13.7                                      | 0.5260                                                          | ns           |
| <b>MDA-MB-468</b> |                                          |                                                   |                                                                 |              |
| DMSO              | 100.00 ± 0.0                             | 120.77 ± 9.7                                      | 0.0564                                                          | ns           |
| Pyrimethamine     | 75.94 ± 2.0                              | 97.20 ± 16.4                                      | 0.0472                                                          | *            |
| NSC3062           | 65.38 ± 1.3                              | 81.08 ± 13.2                                      | 0.2980                                                          | ns           |
| Methotrexate      | 64.00 ± 5.5                              | 81.09 ± 6.9                                       | 0.1986                                                          | ns           |
| Cycloguanil       | 76.08 ± 10.5                             | 84.36 ± 3.0                                       | 0.9566                                                          | ns           |
| NSC3077           | 67.95 ± 6.1                              | 69.82 ± 1.0                                       | >0.9999                                                         | ns           |
| NSC123032         | 71.41 ± 10.0                             | 66.59 ± 2.1                                       | 0.9995                                                          | ns           |
| NSC127159         | 70.45 ± 7.8                              | 77.23 ± 7.2                                       | 0.9902                                                          | ns           |
| NSC127153         | 17.90 ± 7.8                              | 23.92 ± 7.7                                       | 0.9963                                                          | ns           |
| NSC128184         | 12.35 ± 8.6                              | 16.09 ± 10.4                                      | >0.9999                                                         | ns           |
| NSC139105         | 57.09 ± 8.0                              | 81.38 ± 16.9                                      | 0.0143                                                          | *            |

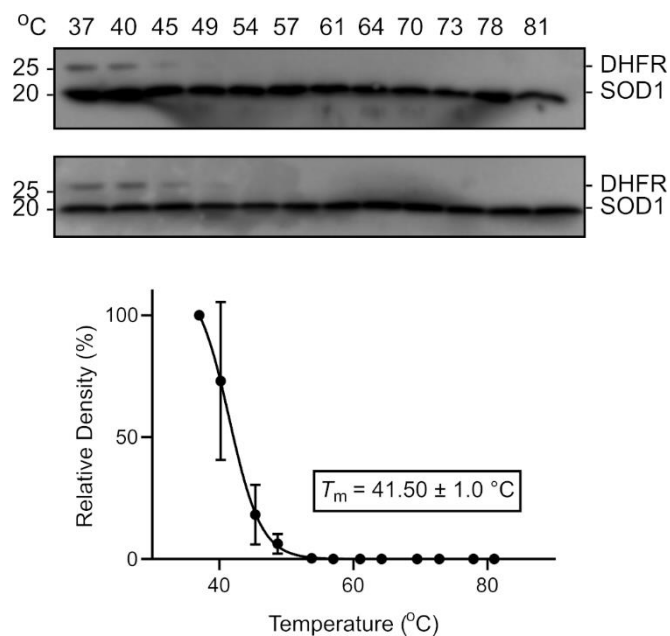

**Figure S4.** Melt curve for DHFR in cell lysate. MDA-MB-468 lysates were incubated from 37 to 81°C for 3 min. The soluble fraction was separated from insoluble, denatured proteins by centrifugation and separated via SDS-PAGE. The density of the DHFR band (~21 kDa) was normalized to the SOD1 band (~15 kDa) in each lane and subsequently normalized to 37°C as 100% (top). Relative densities were plotted against temperature and data were fit to equation (3) to determine the melting temperature ( $T_m$ ) (bottom). All control reactions were performed in duplicate. Error bars represent the standard deviation.



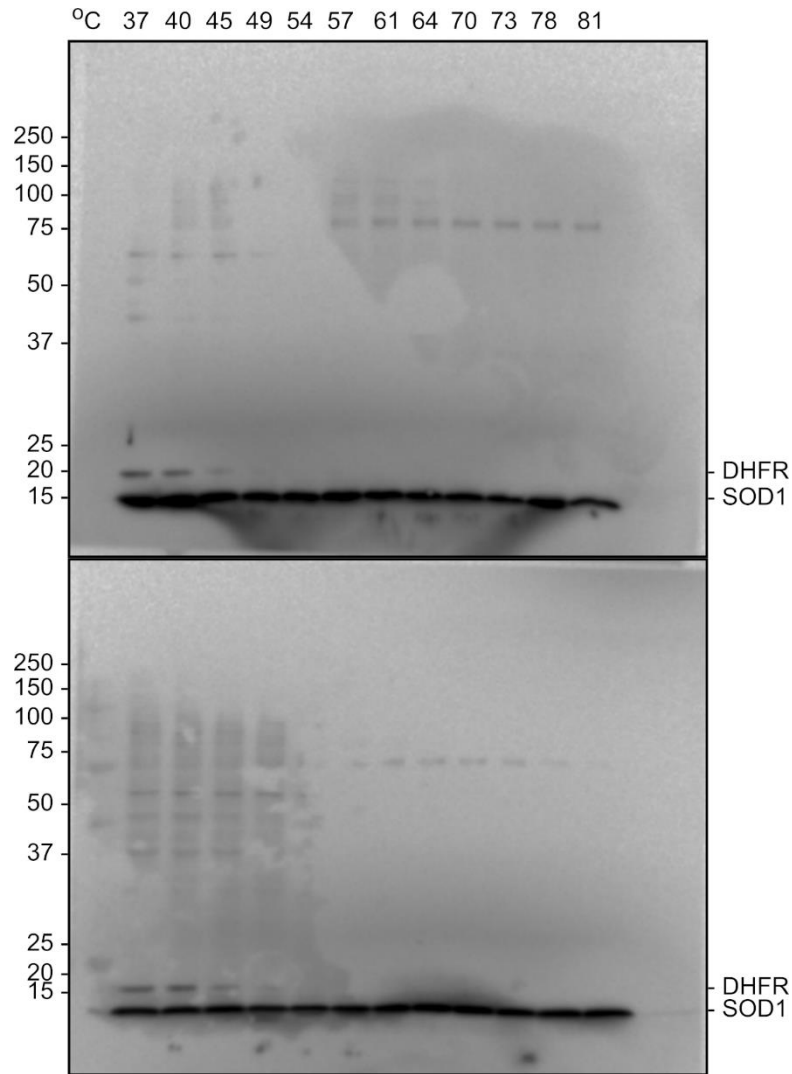

**Figure S5.** Uncropped Western blots for data presented in **Figure S4**. MDA-MB-468 lysates were incubated from 37 to 81°C for 3 min. The soluble fraction was separated from insoluble, denatured proteins by centrifugation and separated via SDS-PAGE. anti-DHFR (from mouse) was used at a dilution of 1:200, anti-SOD1 (from mouse) was used at a dilution of 1:500, and HRP-linked anti-mouse IgG was used at a concentration of 1:3000.

**Table S5.** CETSA analysis of DHFR in lysate treated with cycloguanil-like triazene compounds. To determine statistical significance between each treatment and the DMSO-control, data were analyzed using an Ordinary one-way ANOVA with Dunnett's multiple comparisons. Error represents standard deviation of five replicates from three independent experiments (n=5) (except for NSC3062, standard deviation of four replicates from two independent experiments (n=4)).

| Treatment     | Temperature (°C) | Normalized Band Density (%) | Adjusted <i>p</i> value (compared to DMSO control at 45°C) | Significance |
|---------------|------------------|-----------------------------|------------------------------------------------------------|--------------|
| DMSO          | 37               | 100.00 ± 0.0                | 0.0152                                                     | *            |
| DMSO          | 45               | 20.62 ± 0.6                 | -                                                          | -            |
| Pyrimethamine | 45               | 104.12 ± 33.5               | 0.0095                                                     | **           |
| NSC3062       | 45               | 83.56 ± 52.1                | 0.1186                                                     | ns           |
| Methotrexate  | 45               | 123.37 ± 73.5               | 0.0009                                                     | ***          |
| Cycloguanil   | 45               | 125.67 ± 39.6               | 0.0007                                                     | ***          |
| NSC3077       | 45               | 106.38 ± 29.5               | 0.0072                                                     | **           |
| NSC123032     | 45               | 121.24 ± 45.6               | 0.0011                                                     | **           |
| NSC127159     | 45               | 99.96 ± 26.2                | 0.0153                                                     | *            |
| NSC127153     | 45               | 100.16 ± 36.4               | 0.0150                                                     | *            |
| NSC128184     | 45               | 92.65 ± 34.6                | 0.0341                                                     | *            |
| NSC139105     | 45               | 86.05 ± 21.9                | 0.0669                                                     | ns           |

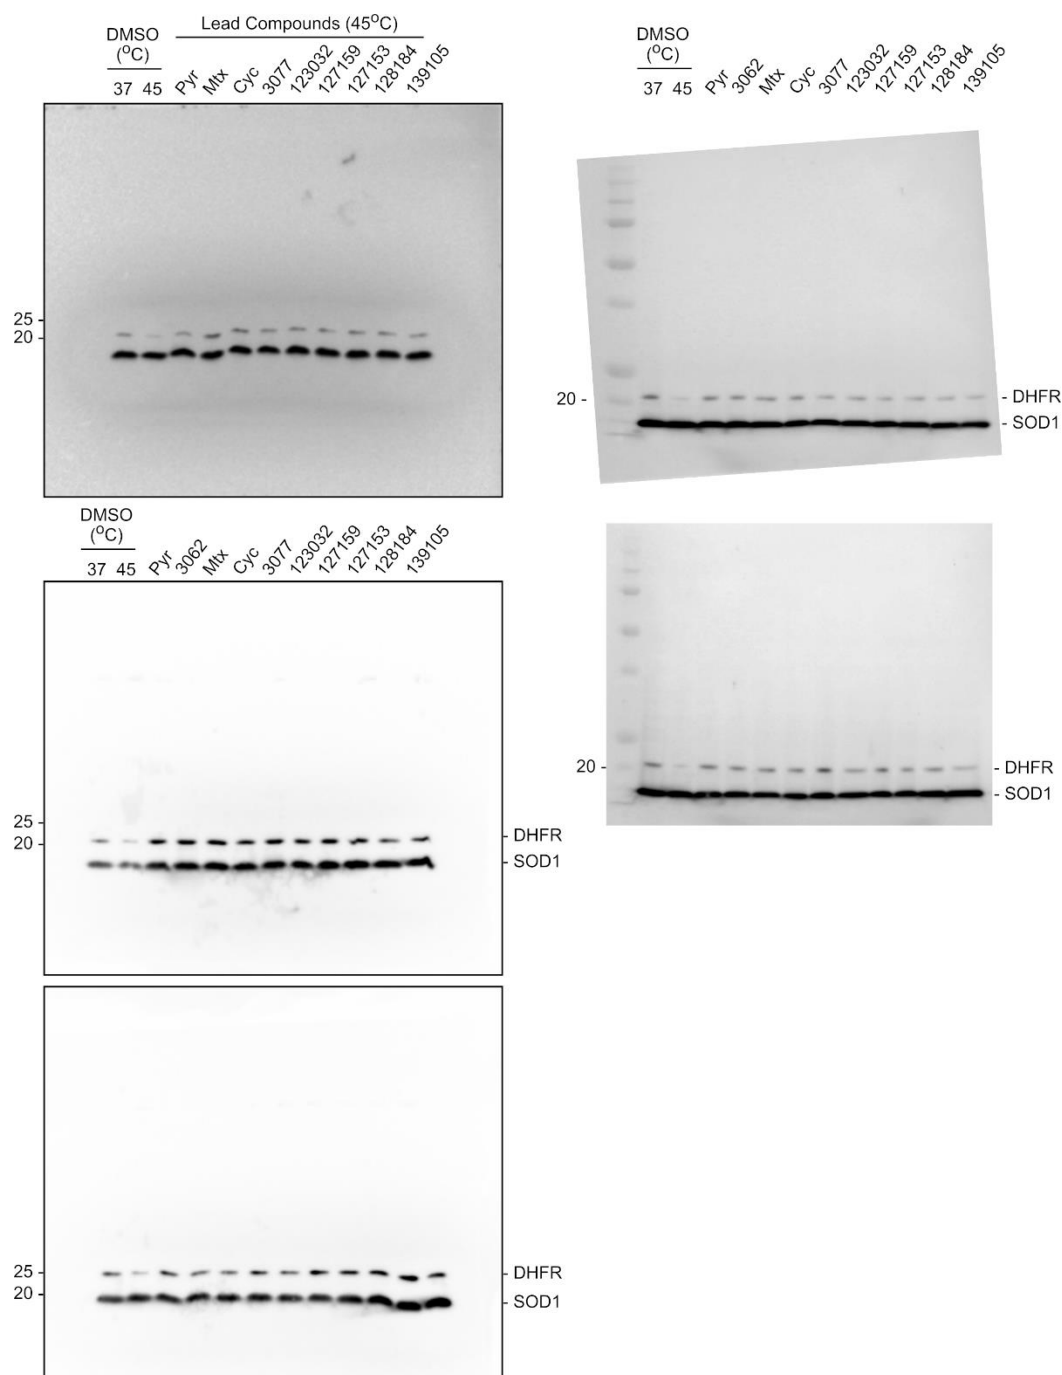

**Figure S6.** Uncropped Western blots for data presented in **Figure 5a** and **Figure 5b**. MDA-MB-468 lysates were treated with 10  $\mu$ M each compound and incubated at 45°C. Lysates were electrophoretically separated and DHFR was detected *via* Western blot. anti-DHFR (from mouse) was used at a dilution of 1:200, anti-SOD1 (from mouse) was used at a dilution of 1:500, and HRP-linked anti-mouse IgG was used at a concentration of 1:3000.

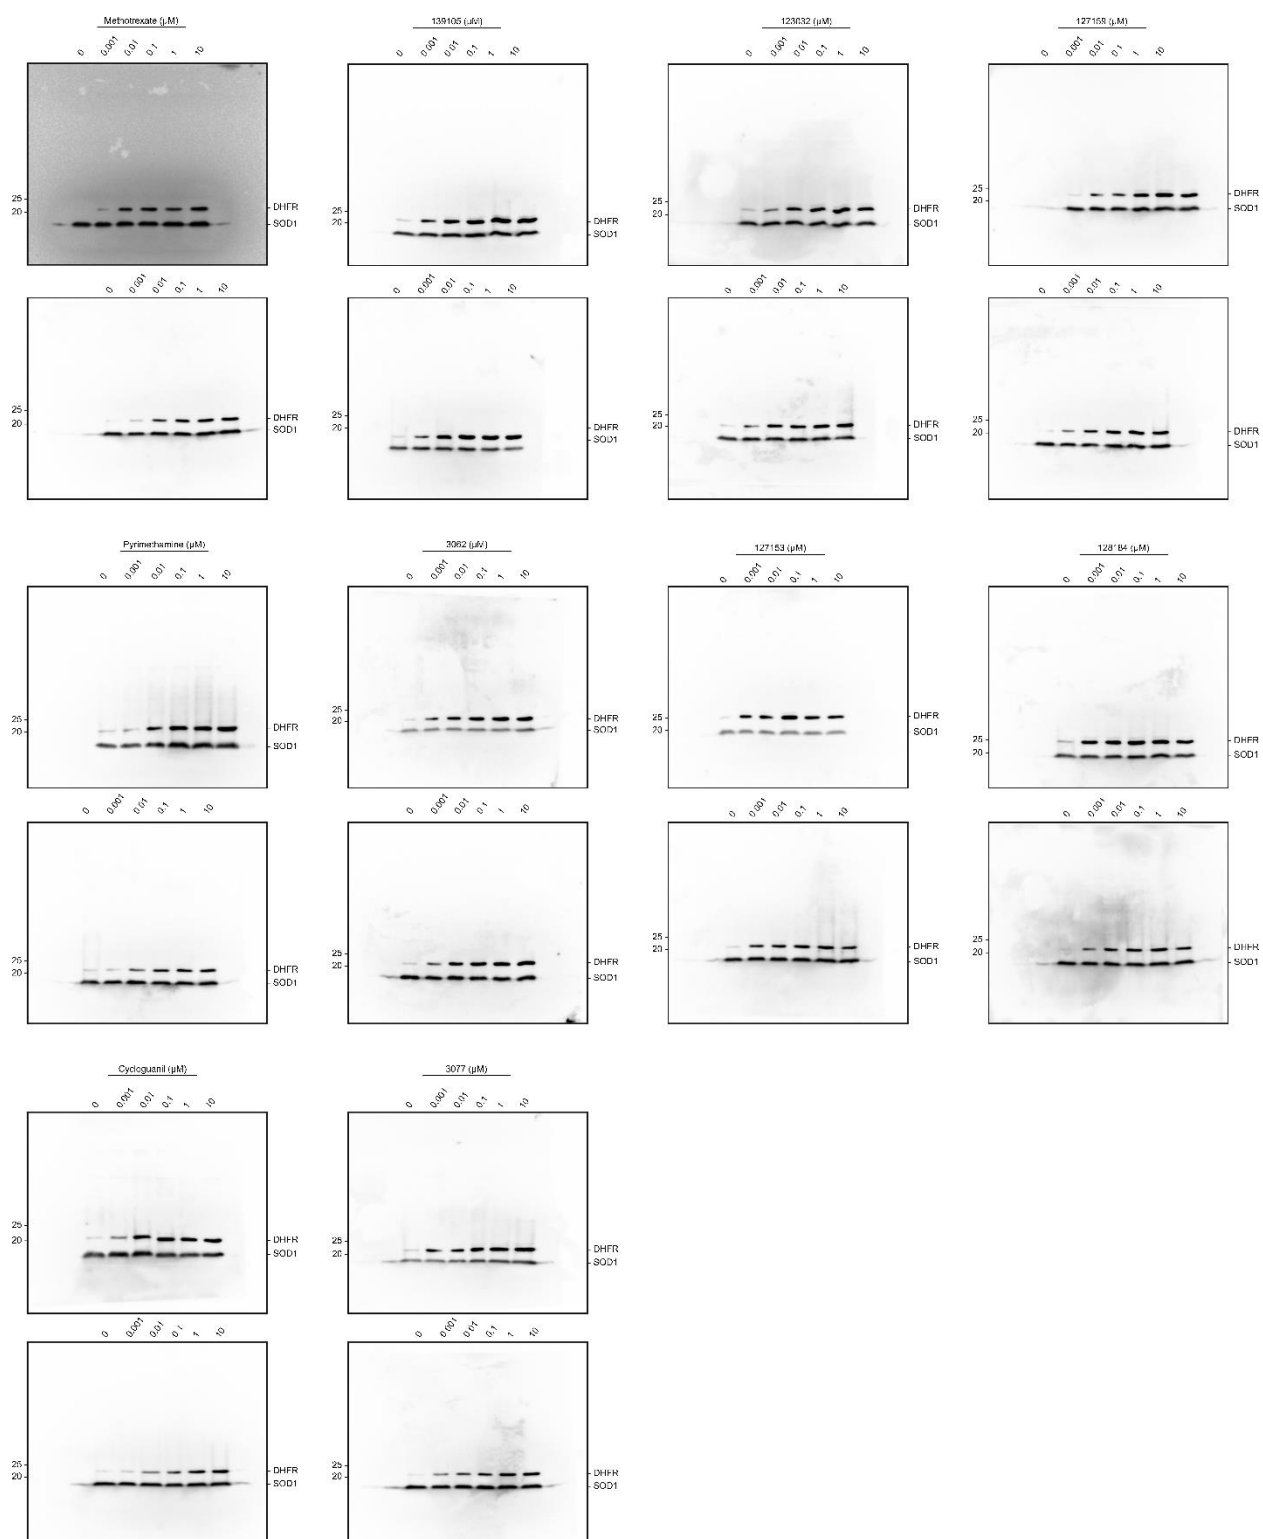

**Figure S7.** Uncropped Western blots for data presented in **Figure 5c**. MDA-MB-468 cells were treated with 0 – 10  $\mu$ M of each inhibitor for 24 h. DHFR and the thermostable SOD1 were detected *via* Western blot. anti-DHFR (from mouse) was used at a dilution of 1:200, anti-SOD1 (from mouse) was used at a dilution of 1:500, and HRP-linked anti-mouse IgG was used at a concentration of 1:3000.

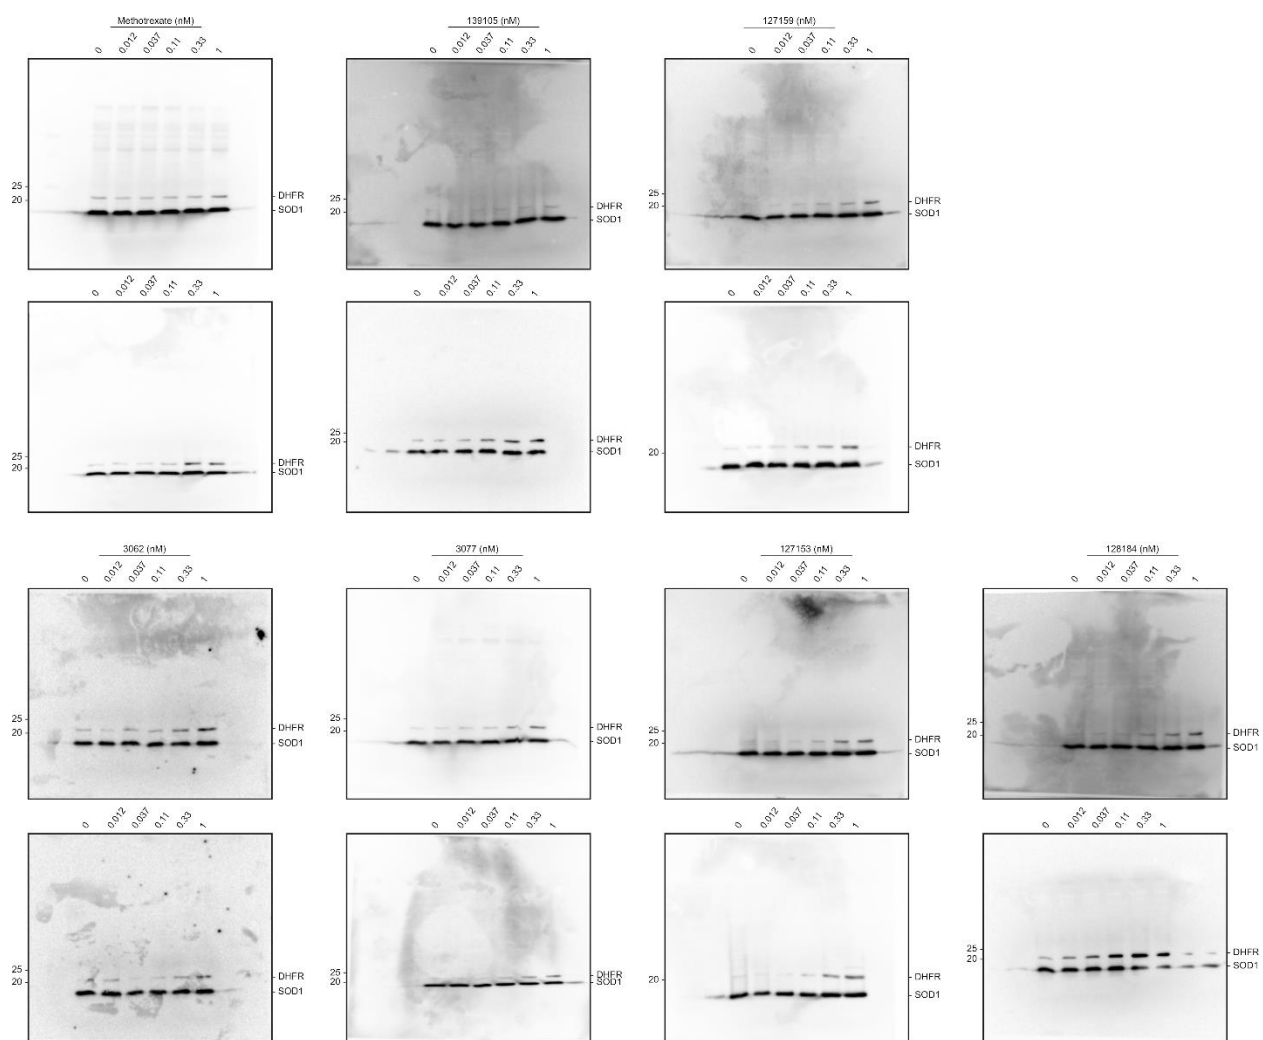

**Figure S8.** Uncropped Western blots for data presented in **Figure 5d**. MDA-MB-468 cells were treated with 0 – 1 nM of each inhibitor for 24 h. DHFR and the thermostable SOD1 were detected *via* Western blot. anti-DHFR (from mouse) was used at a dilution of 1:200, anti-SOD1 (from mouse) was used at a dilution of 1:500, and HRP-linked anti-mouse IgG was used at a concentration of 1:3000.

**a**

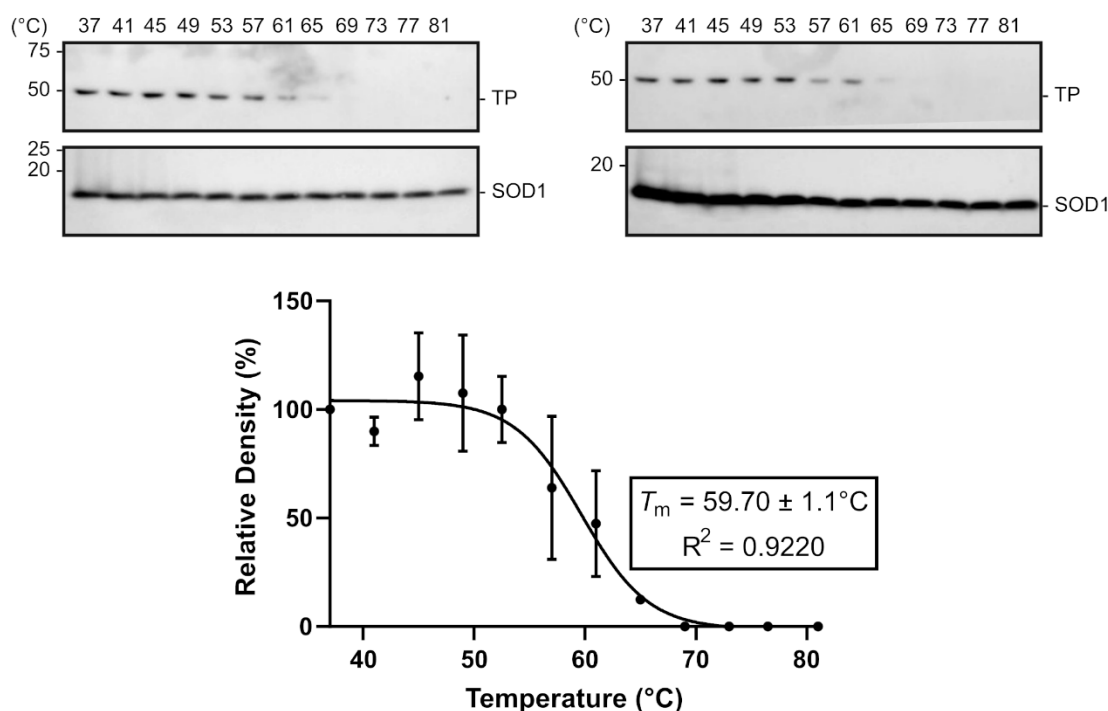

**b**

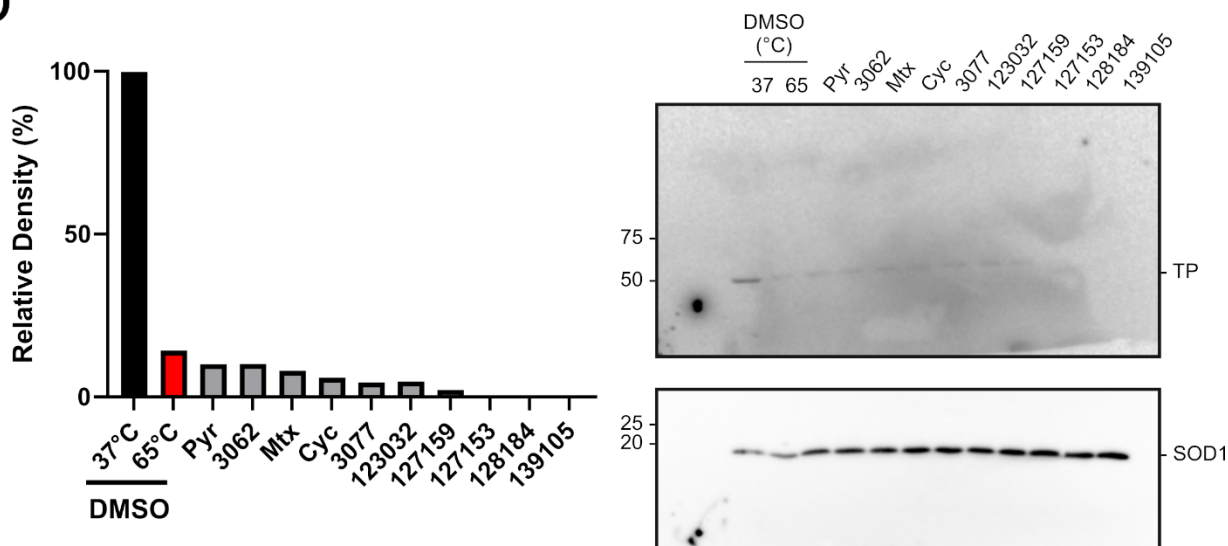

**Figure S9.** Impact of cycloguanil analogues on thymidine phosphorylate thermal stability. (a) Melt curve for TP in cell lysate. MDA-MB-468 lysates were incubated from 37 to 81°C for 3 min. The soluble fraction was separated from insoluble, denatured proteins by centrifugation and separated via SDS-PAGE. The density of the TP band (~50 kDa) was normalized to the SOD1 band (~15 kDa) in each lane and subsequently normalized to 37°C as 100% (top). Relative densities were plotted against temperature and data were fit to equation (3) to determine the melting temperature ( $T_m$ ) (bottom). Reactions were performed in duplicate. Error bars represent the standard deviation. (b) MDA-MB-468 lysates were treated with 10  $\mu\text{M}$  each compound and incubated at 65°C. Lysates were electrophoretically separated and TP was detected via Western blot. TP bands were normalized to the thermostable SOD1 control. Each treatment was performed once ( $n = 1$ ).

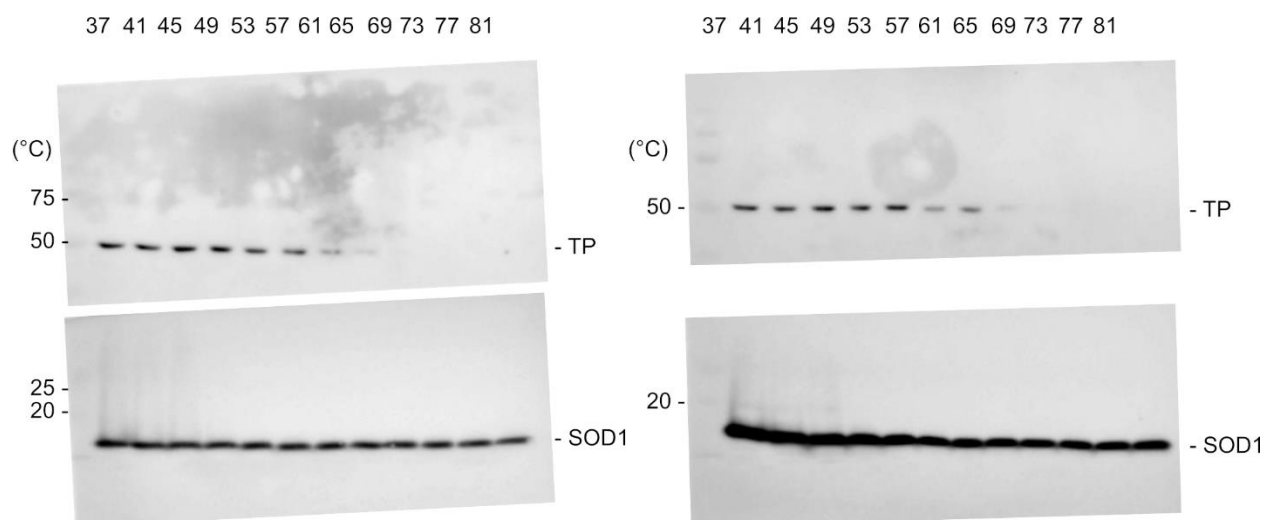

**Figure S10.** Uncropped Western blots for data presented in **Figure S9a**. MDA-MB-468 lysates were incubated from 37 to 81°C for 3 min. The soluble fraction was separated from insoluble, denatured proteins by centrifugation and separated via SDS-PAGE. anti-TP (from mouse) was used at a dilution of 1:100, anti-SOD1 (from mouse) was used at a dilution of 1:500, and HRP-linked anti-mouse IgG was used at a concentration of 1:3000. The membrane was cut half and TP and SOD1 were imaged separately to aid in achieving better TP signal.

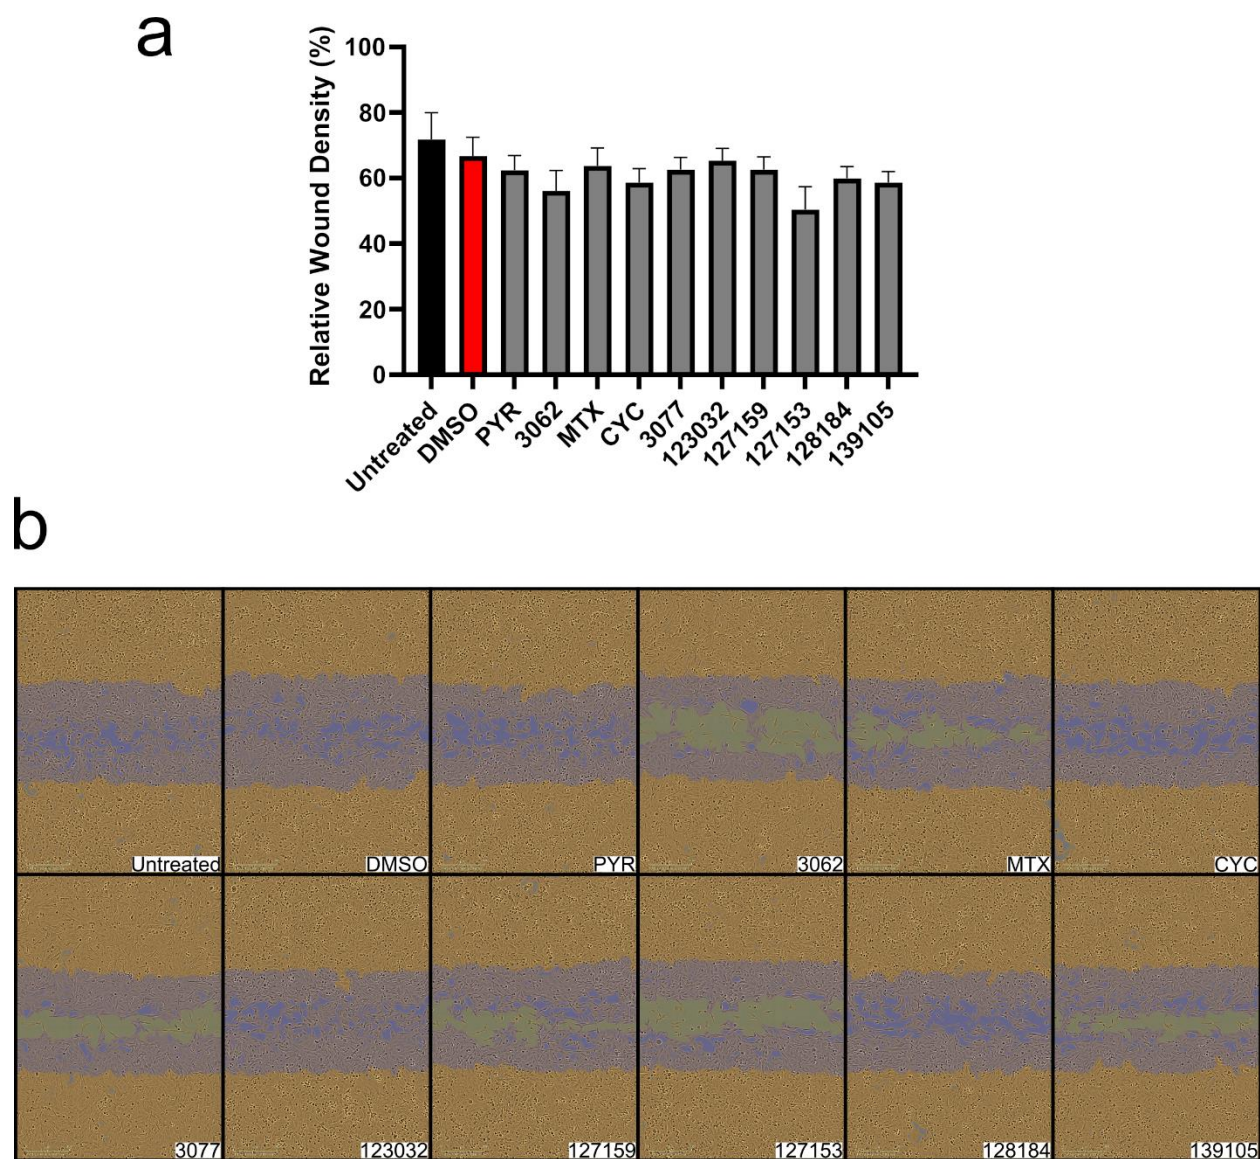

**Figure S11.** Impact of cycloguanil analogues on wound healing. (a) A wound healing assay was performed using MDA-MB-231 breast cancer cells and each inhibitor at 10  $\mu$ M for 24 h as treatments. Migration of cells into the wound were monitored using an IncuCyte Zoom microscope. Relative wound densities were compared to the DMSO control (red) using an Ordinary one-way ANOVA with Dunnett's test for multiple comparisons. All comparisons were not significant. Each experiment was performed in quadruplicate and repeated in three separate assays ( $n = 3$ ). (b) Representative cellular images of each treatment.



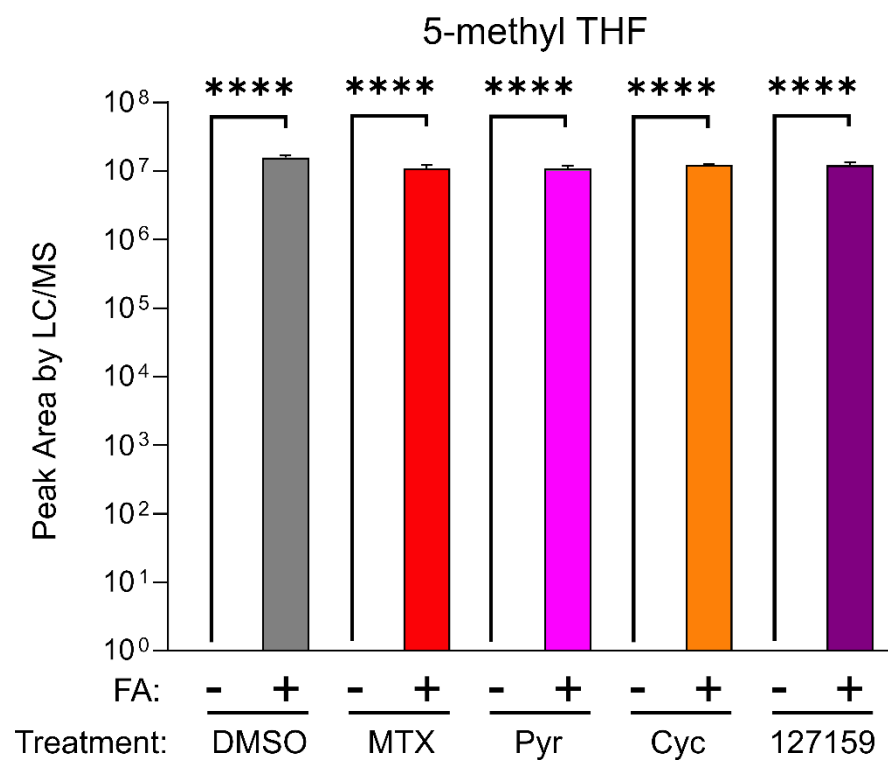

**Figure S12.** Folinic acid supplementation significantly increases folate species that are downstream of DHFR. An Ordinary one-wave ANOVA with Šídák's correction for multiple comparisons was performed to assess significance. For all treatments,  $p < 0.0001$  (\*\*\*\*) (n=4).

**Table S6.** Statistical comparisons for the data presented in **Figure 6**. To determine statistical significance between each treatment alone and DMSO alone and to determine the statistical significance between each treatment supplemented with folinic acid (FA) and DMSO + FA, data were analyzed using an Ordinary one-way ANOVA with Šídák's correction for multiple comparisons. Data are presented separated by analyte (n = 4).

| Comparison            | Significance | Adjusted <i>p</i> value | Comparison                      | Significance | Adjusted <i>p</i> value |
|-----------------------|--------------|-------------------------|---------------------------------|--------------|-------------------------|
| <i>UDP</i>            |              |                         |                                 |              |                         |
| DMSO <i>vs</i> MTX    | ns           | 0.8366                  | DMSO + FA <i>vs</i> MTX + FA    | ns           | 0.9798                  |
| DMSO <i>vs</i> Pyr    | ***          | 0.0004                  | DMSO + FA <i>vs</i> Pyr + FA    | ns           | 0.8180                  |
| DMSO <i>vs</i> Cyc    | ***          | 0.0001                  | DMSO +FA <i>vs</i> Cyc + FA     | ns           | >0.9999                 |
| DMSO <i>vs</i> 127159 | ns           | 0.1481                  | DMSO + FA <i>vs</i> 127159 + FA | **           | 0.0045                  |
| <i>orotate</i>        |              |                         |                                 |              |                         |
| DMSO <i>vs</i> MTX    | **           | 0.0032                  | DMSO + FA <i>vs</i> MTX + FA    | ns           | 0.9995                  |
| DMSO <i>vs</i> Pyr    | ns           | 0.0696                  | DMSO + FA <i>vs</i> Pyr + FA    | ns           | 0.2753                  |
| DMSO <i>vs</i> Cyc    | ns           | 0.9755                  | DMSO +FA <i>vs</i> Cyc + FA     | ns           | 0.6586                  |
| DMSO <i>vs</i> 127159 | ****         | <0.0001                 | DMSO + FA <i>vs</i> 127159 + FA | ****         | <0.0001                 |
| <i>IMP</i>            |              |                         |                                 |              |                         |
| DMSO <i>vs</i> MTX    | ****         | <0.0001                 | DMSO + FA <i>vs</i> MTX + FA    | ns           | >0.9999                 |
| DMSO <i>vs</i> Pyr    | ****         | <0.0001                 | DMSO + FA <i>vs</i> Pyr + FA    | **           | 0.0052                  |
| DMSO <i>vs</i> Cyc    | ***          | 0.0002                  | DMSO +FA <i>vs</i> Cyc + FA     | ns           | 0.9560                  |
| DMSO <i>vs</i> 127159 | ****         | <0.0001                 | DMSO + FA <i>vs</i> 127159 + FA | **           | 0.0086                  |
| <i>CDP</i>            |              |                         |                                 |              |                         |
| DMSO <i>vs</i> MTX    | ****         | <0.0001                 | DMSO + FA <i>vs</i> MTX + FA    | ns           | >0.9999                 |
| DMSO <i>vs</i> Pyr    | ****         | <0.0001                 | DMSO + FA <i>vs</i> Pyr + FA    | ns           | 0.4617                  |
| DMSO <i>vs</i> Cyc    | ****         | <0.0001                 | DMSO +FA <i>vs</i> Cyc + FA     | ns           | >0.9999                 |
| DMSO <i>vs</i> 127159 | ****         | <0.0001                 | DMSO + FA <i>vs</i> 127159 + FA | ****         | <0.0001                 |
| <i>ADP</i>            |              |                         |                                 |              |                         |
| DMSO <i>vs</i> MTX    | ****         | <0.0001                 | DMSO + FA <i>vs</i> MTX + FA    | **           | 0.0039                  |
| DMSO <i>vs</i> Pyr    | ****         | <0.0001                 | DMSO + FA <i>vs</i> Pyr + FA    | ****         | <0.0001                 |
| DMSO <i>vs</i> Cyc    | ****         | <0.0001                 | DMSO +FA <i>vs</i> Cyc + FA     | ***          | 0.0006                  |
| DMSO <i>vs</i> 127159 | ****         | <0.0001                 | DMSO + FA <i>vs</i> 127159 + FA | ****         | <0.0001                 |
| <i>GDP</i>            |              |                         |                                 |              |                         |
| DMSO <i>vs</i> MTX    | ****         | <0.0001                 | DMSO + FA <i>vs</i> MTX + FA    | ns           | >0.9999                 |

|                       |      |         |                                 |      |         |
|-----------------------|------|---------|---------------------------------|------|---------|
| DMSO <i>vs</i> Pyr    | **** | <0.0001 | DMSO + FA <i>vs</i> Pyr + FA    | ns   | 0.6559  |
| DMSO <i>vs</i> Cyc    | **** | <0.0001 | DMSO +FA <i>vs</i> Cyc + FA     | ns   | 0.9993  |
| DMSO <i>vs</i> 127159 | **** | <0.0001 | DMSO + FA <i>vs</i> 127159 + FA | *    | 0.0176  |
| <i>dUMP</i>           |      |         |                                 |      |         |
| DMSO <i>vs</i> MTX    | **** | <0.0001 | DMSO + FA <i>vs</i> MTX + FA    | ns   | >0.9999 |
| DMSO <i>vs</i> Pyr    | *    | 0.0244  | DMSO + FA <i>vs</i> Pyr + FA    | ns   | >0.9999 |
| DMSO <i>vs</i> Cyc    | *    | 0.0321  | DMSO +FA <i>vs</i> Cyc + FA     | ns   | >0.9999 |
| DMSO <i>vs</i> 127159 | **** | <0.0001 | DMSO + FA <i>vs</i> 127159 + FA | ns   | >0.9999 |
| <i>GAR</i>            |      |         |                                 |      |         |
| DMSO <i>vs</i> MTX    | **** | <0.0001 | DMSO + FA <i>vs</i> MTX + FA    | ns   | >0.9999 |
| DMSO <i>vs</i> Pyr    | **** | <0.0001 | DMSO + FA <i>vs</i> Pyr + FA    | ns   | >0.9999 |
| DMSO <i>vs</i> Cyc    | **** | <0.0001 | DMSO +FA <i>vs</i> Cyc + FA     | ns   | >0.9999 |
| DMSO <i>vs</i> 127159 | **** | <0.0001 | DMSO + FA <i>vs</i> 127159 + FA | ***  | 0.0006  |
| <i>AICAR</i>          |      |         |                                 |      |         |
| DMSO <i>vs</i> MTX    | ns   | 0.7666  | DMSO + FA <i>vs</i> MTX + FA    | ns   | 0.0782  |
| DMSO <i>vs</i> Pyr    | **** | <0.0001 | DMSO + FA <i>vs</i> Pyr + FA    | ns   | >0.9999 |
| DMSO <i>vs</i> Cyc    | **** | <0.0001 | DMSO +FA <i>vs</i> Cyc + FA     | ns   | 0.6519  |
| DMSO <i>vs</i> 127159 | *    | 0.0119  | DMSO + FA <i>vs</i> 127159 + FA | **** | <0.0001 |

## STAT3 Dependent Luciferase Assay

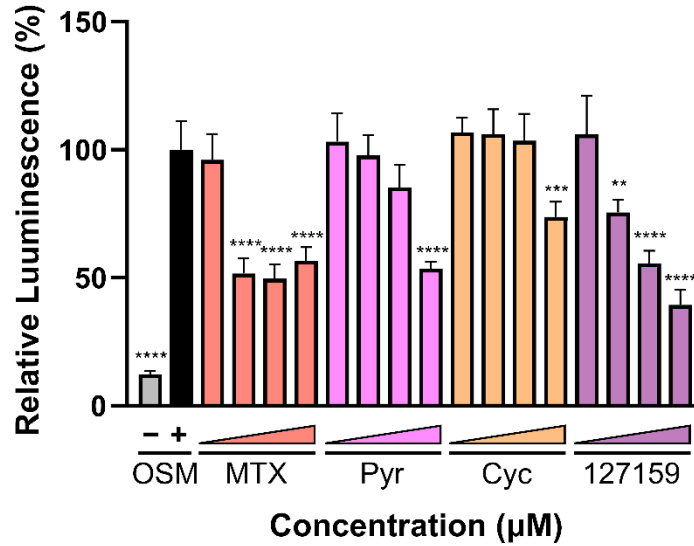

**Figure S13.** DHFR inhibitors block STAT3-dependent gene expression. U3A cells were incubated with respective inhibitors for 1 h prior to the addition of OSM (10 ng/mL) or vehicle control and incubation for 5 h. Luciferin was added and luminescence measured. Presented data are normalized to the OSM stimulated control (100%), statistical significance was determined using an Ordinary one-way ANOVA with a Dunnett multiple comparison test, (\*\* =  $p \leq 0.01$ ; \*\*\*\* =  $p \leq 0.0001$ ). This is an additional independent experiment complementary to the data presented in **Figure 7** (n=4).

**Table S7.** Statistical comparisons for the data presented in Figure 7 and Figure S13. To determine statistical significance between each treatment and OSM stimulated cells, data were analyzed using an Ordinary one-way ANOVA with Dunnett's correction for multiple comparisons. Data are presented separated by independent experiment. Technical quadruplicates were performed for each individual experiment.

| Treatment    | Concentration (μM) | Data from Figure 7 |                         | Data from Figure S13 |                         |
|--------------|--------------------|--------------------|-------------------------|----------------------|-------------------------|
|              |                    | Significance       | Adjusted <i>p</i> value | Significance         | Adjusted <i>p</i> value |
| Unstimulated | -                  | ****               | <0.0001                 | ****                 | <0.0001                 |
| MTX          | 0.02               | ****               | <0.0001                 | ns                   | 0.9990                  |
|              | 0.2                | ****               | <0.0001                 | ****                 | <0.0001                 |
|              | 2                  | ****               | <0.0001                 | ****                 | <0.0001                 |
|              | 20                 | ****               | <0.0001                 | ****                 | <0.0001                 |
| Pyr          | 0.02               | ns                 | 0.4058                  | ns                   | 0.9992                  |
|              | 0.2                | ****               | <0.0001                 | ns                   | 0.9995                  |
|              | 2                  | ****               | <0.0001                 | ns                   | 0.1247                  |
|              | 20                 | ****               | <0.0001                 | ****                 | <0.0001                 |
| Cyc          | 0.02               | ****               | <0.0001                 | ns                   | 0.9188                  |
|              | 0.2                | ****               | <0.0001                 | ns                   | 0.9567                  |
|              | 2                  | ****               | <0.0001                 | ns                   | 0.9991                  |
|              | 20                 | ****               | <0.0001                 | ***                  | 0.0004                  |
| 127159       | 0.02               | **                 | 0.0068                  | ns                   | 0.9672                  |
|              | 0.2                | ****               | <0.0001                 | **                   | 0.0011                  |
|              | 2                  | ****               | <0.0001                 | ****                 | <0.0001                 |
|              | 20                 | ****               | <0.0001                 | ****                 | <0.0001                 |

## Supplementary Methods

### *Chemical Synthesis of NSC3077*

NSC3077 (4,6-diamino-3-(3,4-dichlorophenyl)-2,2-dimethyl-2,3-dihydro-1,3,5-triazine-HCl)

A mixture of 3,4-dichloroaniline (0.309 mmol, 50 mg), 1-cyanoguanidine (0.339 mmol, 28.54 mg), acetone (1.23 mL), and conc. HCl (0.309 mmol, 0.025 mL) was refluxed and stirred for 24 h monitoring reaction completion by TLC. The crude reaction mixture was left at 4 °C overnight yielding crystals that were collected by suction filtration and washed with cold acetone.

NMR data were collected using a Bruker Ascend 400 MHz NMR instrument. <sup>1</sup>H NMR, 400 MHz, CD<sub>3</sub>OD, δ = 1.50 (d, *J* = 2.8 Hz, 6H, CH<sub>3</sub>), 7.39 (d of d, *J* = 2.0 and 8.8 Hz, 1H, CH), 7.69 (d, *J* = 2 Hz, 1H, CH), 7.75 (d, *J* = 8.8 Hz, 1H, CH). <sup>13</sup>C NMR (100 MHz, CD<sub>3</sub>OD, δ = 27.4, 27.5, 72.0, 131.1, 133.3, 133.4, 135.1, 135.7, 135.9, 158.7, 158.8.

## References

1. Heppler, L.N.; Attarha, S.; Persaud, R.; Brown, J.I.; Wang, P.; Petrova, B.; Tošić, I.; Burton, F.B.; Flamand, Y.; Walker, S.R.; et al. The Antimicrobial Drug Pyrimethamine Inhibits STAT3 Transcriptional Activity by Targeting the Enzyme Dihydrofolate Reductase. *J. Biol. Chem.* **2022**, *298*, 101531, doi:10.1016/j.jbc.2021.101531.
